# Supplementary material for: Pioneering adsorption-assisted electrochemical polymerization approach for the fabrication of an acetaminophen sensor: experimental and theoretical studies
Source: Royal Society of Chemistry journal article supplement (doi:10.1039/d5ra07827j), 2025-01-01
Supplement: d5ra07827j1.pdf [file d5ra07827j1.pdf]

### Supplementary Information

#### **A pioneer adsorption-assisted electrochemical polymerization approach to the fabrication of acetaminophen sensor: Experimental and theoretical studies**

**Saheed E. Elugoke<sup>1\*</sup>, Usisipho Feleni<sup>2</sup>, Abolanle S. Adekunle<sup>2,3</sup>, Thabo T.I. Nkambule<sup>2</sup>,  
Bhekie B. Mamba<sup>2</sup> and Eno E. Ebenso<sup>1,\*</sup>**

<sup>1</sup>Centre for Materials Science, College of Science, Engineering and Technology (CSET), Johannesburg 1710, South Africa

<sup>2</sup>Institute for Nanotechnology and Water Sustainability, College of Science, Engineering and Technology (CSET), Johannesburg 1710, South Africa

<sup>3</sup>Institute for Catalysis and Energy Solutions (ICES), College of Science, Engineering and Technology (CSET), Johannesburg 1710, South Africa

\* Corresponding author: Centre for Material Science, College of Science, Engineering and Technology, University of South Africa, Johannesburg 1709, South Africa. Email: S.E. Elugoke-elugokesaheed@gmail.com, elugose@unisa.ac.za; Prof. E.E. Ebenso- ebensee@unisa.ac.za

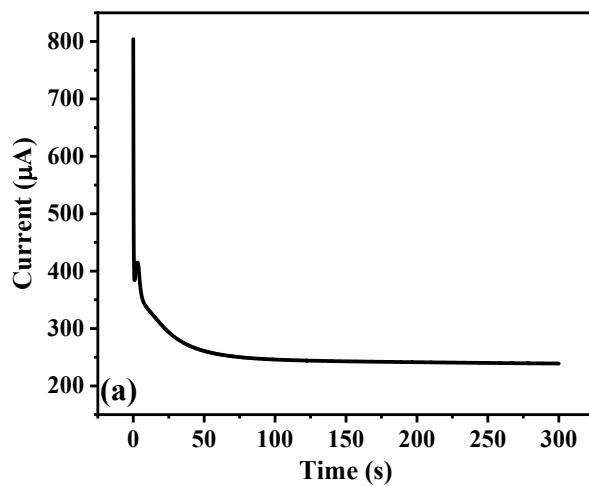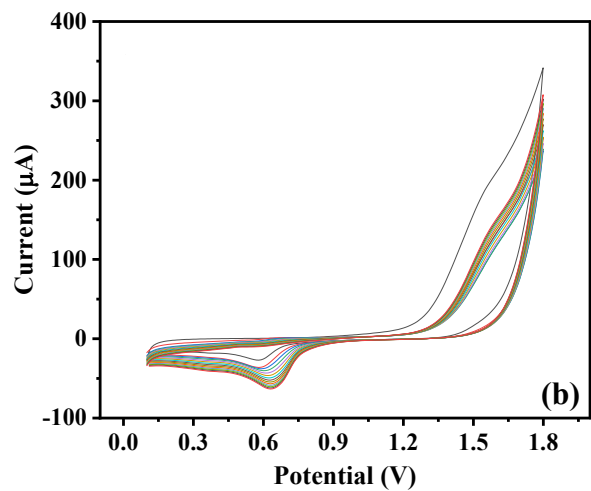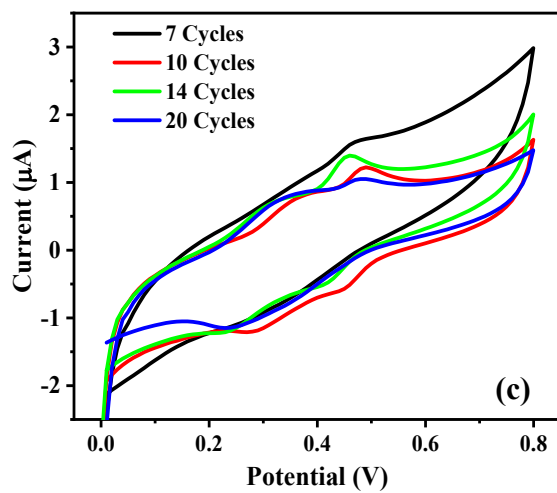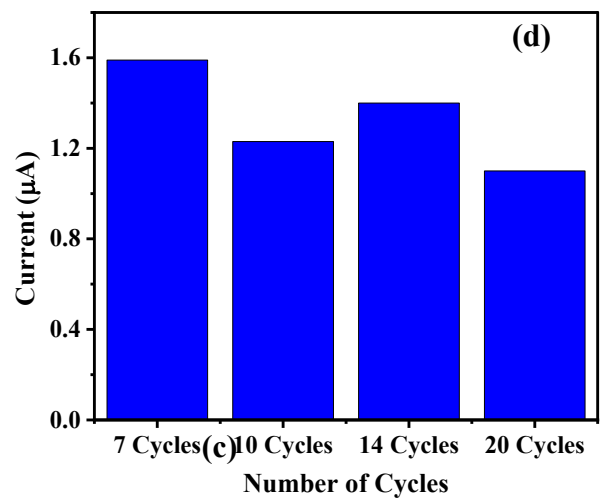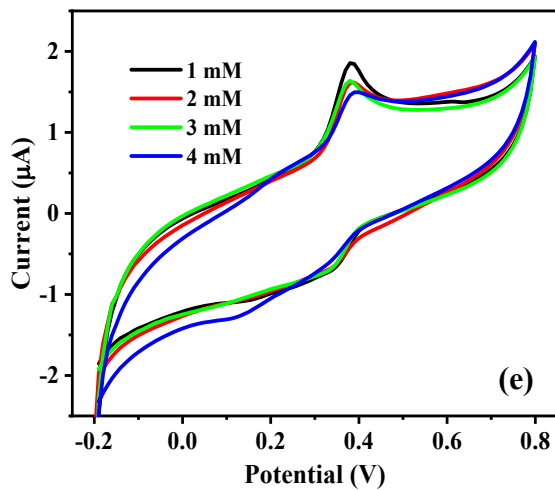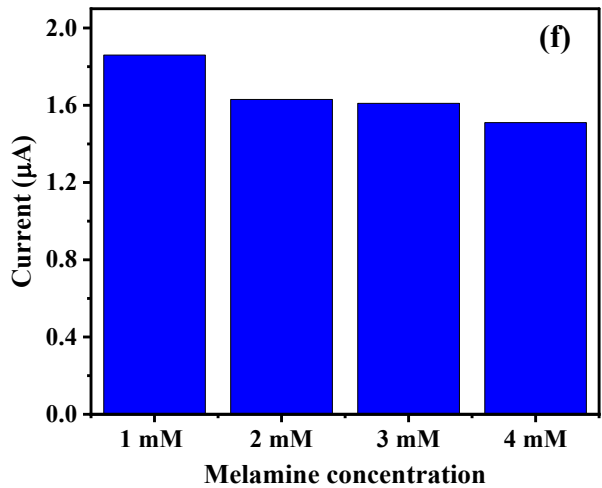

**Figure S1:** (a) I-t curve for GCE anodization. (b) Cyclic voltammograms (14 CV cycles) of EPM/GCE fabricated after electropolymerization at a scan rate of  $100 \text{ mV s}^{-1}$ . Cyclic voltammograms of  $7.62 \text{ }\mu\text{M}$  ACE at EPM/GCE using varying (c, e) CV cycles and melamine concentration at  $25 \text{ mV s}^{-1}$ . Plots of currents against (d, f) number of CV cycles and melamine concentration

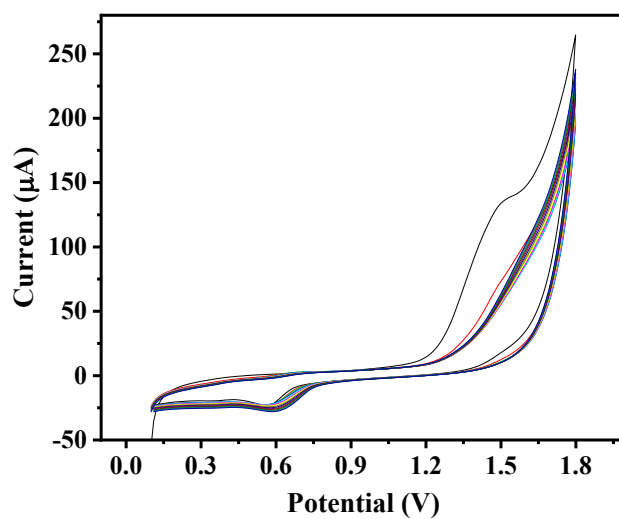

**Figure S2:** I-t curve for GCE oxidation. Cyclic voltammograms (14 CV cycles) of CPM/GCE after electrodeposition at a scan rate of 100 mV s<sup>-1</sup>

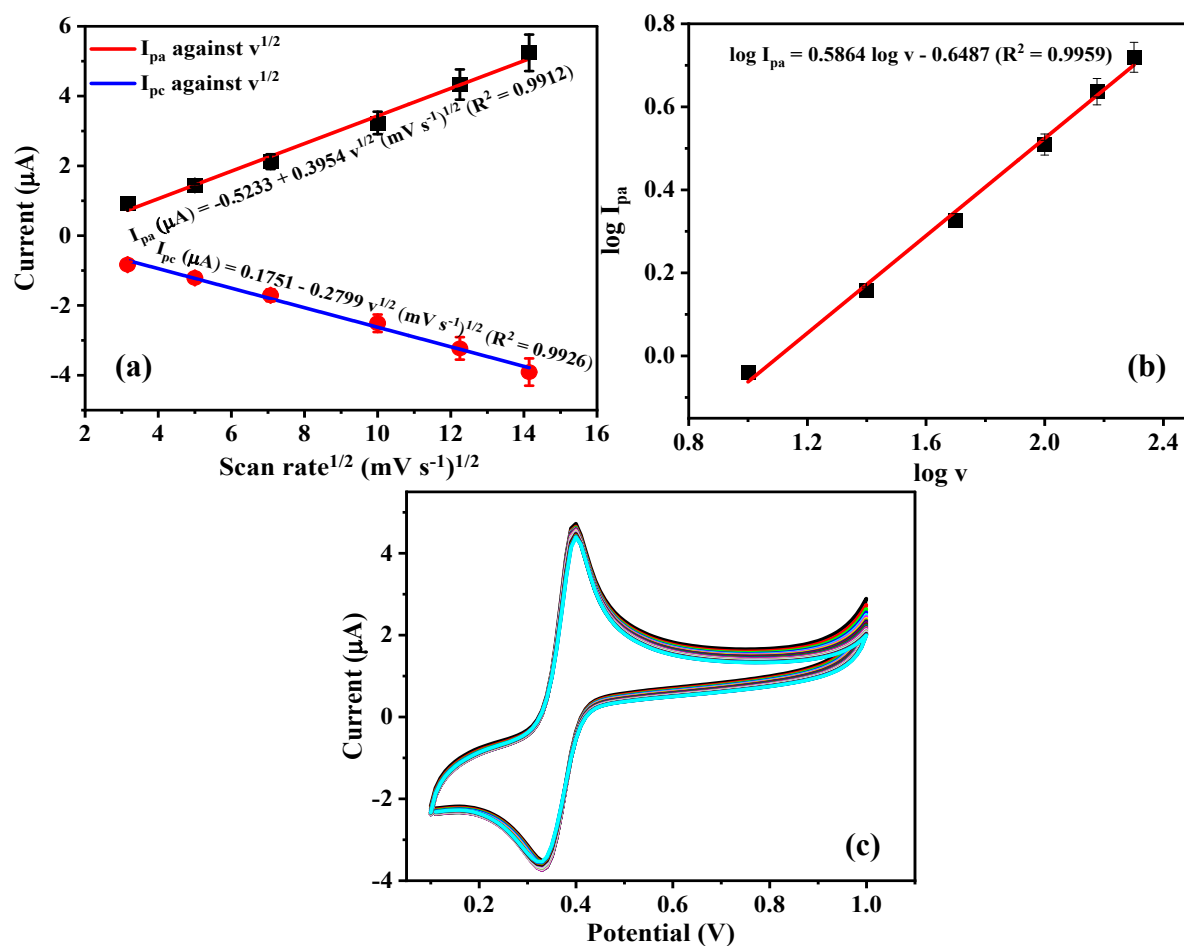

**Figure S3:** Plot of (a) peak currents against square root of scan rate and (b)  $\log I_{pa}$  against  $\log v$ .  
(c) Cyclic voltammograms (30 CV scans) of 0.16 mM ACE at EPM/GCE
